# Supplementary material
Source: PubMed Central journal article supplement (PMC240696)
Supplement: pnas_100_22_12787__1.pdf [file pnas_100_22_12787__1.pdf]

Table 1. Alignment of Alu Ye5 subfamily members identified using the BLAST search described.

|         | 10                                                                                    | 20 | 30 | 40 | 50 | 60 | 70 | 80 |    |
|---------|---------------------------------------------------------------------------------------|----|----|----|----|----|----|----|----|
| Ye5     | -----+-----+-----+-----+-----+-----+-----+-----+-----                                 |    |    |    |    |    |    |    | 79 |
|         | ---GGCCGGGCGCGGTGGCTCAC-GCCTGTAATCCACGACCTTTGGGAGGCCGAGGCGGGCGGATCAC--GAGGTCAGGAGATCG |    |    |    |    |    |    |    |    |
| Ye5AH1  | -----+-----+-----+-----+-----+-----+-----+-----+-----                                 |    |    |    |    |    |    |    | 9  |
| Ye5AH2  | ---.....-.....T.....A.....--.....A.....                                               |    |    |    |    |    |    |    | 79 |
| Ye5AH4  | ---.....-A.....T.....A.....--.....                                                    |    |    |    |    |    |    |    | 79 |
| Ye5AH5  | ---...T...A...-TA...A...A...--.....                                                   |    |    |    |    |    |    |    | 79 |
| Ye5AH6  | ---...T...A.A...-.....T.....C...--.....                                               |    |    |    |    |    |    |    | 79 |
| Ye5AH8  | ---.....-.....C.....-.....G.....                                                      |    |    |    |    |    |    |    | 79 |
| Ye5AH10 | ---.....A.....T.....-.....                                                            |    |    |    |    |    |    |    | 79 |
| Ye5AH12 | -----.....T.....-.....                                                                |    |    |    |    |    |    |    | 36 |
| Ye5AH13 | ---.....T.....-.....T.....-.....                                                      |    |    |    |    |    |    |    | 79 |
| Ye5AH14 | ---.....G.....A.....-.....                                                            |    |    |    |    |    |    |    | 79 |
| Ye5AH16 | ---.....-A.....A.....-A.....                                                          |    |    |    |    |    |    |    | 79 |
| Ye5AH17 | -----.....-.....-A.....                                                               |    |    |    |    |    |    |    | 76 |
| Ye5AH18 | ---.....-C.....T.....-.....T.....                                                     |    |    |    |    |    |    |    | 79 |
| Ye5AH20 | -----.....A.T.....-.....                                                              |    |    |    |    |    |    |    | 49 |
| Ye5AH21 | ---...C.....-.....A.....-A.....                                                       |    |    |    |    |    |    |    | 79 |
| Ye5AH22 | ---.....T.....A.....-.....                                                            |    |    |    |    |    |    |    | 79 |
| Ye5AH24 | ---.....A.....A.....T.....-.....                                                      |    |    |    |    |    |    |    | 79 |
| Ye5AH27 | ---...A.A.T.....-.....A.....-.....T.....                                              |    |    |    |    |    |    |    | 79 |
| Ye5AH29 | ---.....T...A.....A...T.....-.....T.....                                              |    |    |    |    |    |    |    | 79 |
| Ye5AH30 | ---...A.....T.T.....-.....                                                            |    |    |    |    |    |    |    | 79 |
| Ye5AH31 | ---...T...T.....-.....                                                                |    |    |    |    |    |    |    | 79 |
| Ye5AH32 | ---.....T.....T.T.....T.....T.....-.....                                              |    |    |    |    |    |    |    | 79 |
| Ye5AH34 | ---.....-.....C.....T.....T--.....                                                    |    |    |    |    |    |    |    | 79 |
| Ye5AH35 | ---...T.....G.....T.....-.....                                                        |    |    |    |    |    |    |    | 79 |
| Ye5AH36 | -----+-----+-----+-----+-----+-----+-----+-----+-----                                 |    |    |    |    |    |    |    | 0  |
| Ye5AH37 | ---.....-.....A.....T.....-.....C.....                                                |    |    |    |    |    |    |    | 78 |
| Ye5AH38 | ---.....T.....G.....A...T.....-.....                                                  |    |    |    |    |    |    |    | 79 |
| Ye5AH39 | ---.....A.....C...A.....-.....                                                        |    |    |    |    |    |    |    | 79 |
| Ye5AH41 | ---A...A...T.....AA.....G.....-.....A.....                                            |    |    |    |    |    |    |    | 79 |
| Ye5AH43 | ---...T...T.....C.....CT.....T...                                                     |    |    |    |    |    |    |    | 81 |
| Ye5AH44 | ---.....A.....-.....                                                                  |    |    |    |    |    |    |    | 79 |
| Ye5AH45 | ---.....-.....-.....G.....                                                            |    |    |    |    |    |    |    | 78 |
| Ye5AH47 | -----+-----+-----+-----+-----+-----+-----+-----+-----                                 |    |    |    |    |    |    |    | 0  |
| Ye5AH48 | ---.....T.....-.....-A.....TA.....                                                    |    |    |    |    |    |    |    | 79 |
| Ye5AH50 | ---...A.....-T.....C.....T.....-.....                                                 |    |    |    |    |    |    |    | 79 |
| Ye5AH52 | -----+-----+-----+-----+-----+-----+-----+-----+-----                                 |    |    |    |    |    |    |    | 0  |
| Ye5AH53 | ---.....A.....T.....A.....G--.....                                                    |    |    |    |    |    |    |    | 79 |
| Ye5AH54 | ---...A.....C...A...A.....-.....T.....                                                |    |    |    |    |    |    |    | 77 |
| Ye5AH55 | -----+-----+-----+-----+-----+-----+-----+-----+-----                                 |    |    |    |    |    |    |    | 56 |
| Ye5AH56 | ---...A.....T.A.....A.....A.....-.....A.....                                          |    |    |    |    |    |    |    | 79 |

|          |                                                   |    |
|----------|---------------------------------------------------|----|
| Ye5AH57  | -----                                             | 0  |
| Ye5AH60  | ---.....-A.....A..A.....-A.....                   | 79 |
| Ye5AH61  | -----                                             | 0  |
| Ye5AH63  | ---...A.....-.....T.....--...C.....               | 79 |
| Ye5AH64  | ---.....C..A.....A.....G.                         | 79 |
| Ye5AH66  | ---...T.....-.....A.....A.....--...A.....         | 79 |
| Ye5AH68  | ---.....-A.....T.....--.....T.                    | 79 |
| Ye5AH69  | ---.....C.....-C.....A.....A.....                 | 79 |
| Ye5AH70  | -----C.....A.A.....T--.....                       | 71 |
| Ye5AH71  | ---...T.....-.....T..G.....--.....                | 79 |
| Ye5AH73  | ---.....A.....-.....A.....T.....--...A.....       | 78 |
| Ye5AH75  | ---.....T.....--.....A.....                       | 79 |
| Ye5AH76  | GGA.....-.....T.....T.....--.....A                | 82 |
| Ye5AH77  | ---.....C.....-.....T.....A..C.....-G.....        | 79 |
| Ye5AH80  | ---.....T.....-.....T.....-.....C.....            | 79 |
| Ye5AH85  | ---...T..C.....-.....C.....                       | 79 |
| Ye5AH86  | ---...A..A.....T.T-..A.....T..T.A.....-A.....TT.. | 79 |
| Ye5AH89  | ---.....T.....T.....                              | 79 |
| Ye5AH92  | ---.....A.....-.....T.....G.....T.....T--T.....   | 79 |
| Ye5AH93  | ---...T.....-.....G.....T.....--.....             | 79 |
| Ye5AH95  | ---.....A-.....C.A.....A..G.--.....               | 79 |
| Ye5AH97  | ---.....-A.....                                   | 79 |
| Ye5AH99  | -----                                             | 0  |
| Ye5AH100 | ---...T..A.....A.....A.....--.....                | 79 |
| Ye5AH102 | ---...A..T.....G-.....T.....--.....               | 79 |
| Ye5AH103 | -----                                             | 0  |
| Ye5AH104 | -----G.....                                       | 78 |
| Ye5AH109 | ---.....T.....--.....                             | 79 |
| Ye5AH110 | ---...T.....-.....T.....-.....                    | 79 |
| Ye5AH112 | ---.....A.....-.....                              | 79 |
| Ye5AH114 | ---.....A.T.T.....--.....T.                       | 79 |
| Ye5AH115 | ---.....A.....T.....--.....                       | 79 |
| Ye5AH116 | ---.....T.....T.....--.....                       | 79 |
| Ye5AH119 | ---...T.....-.....A.....-.....                    | 79 |
| Ye5AH120 | ---.....-A.....T..A.....A.....--.....             | 79 |
| Ye5AH122 | ---.....-.....-.....A                             | 79 |
| Ye5AH123 | -----                                             | 0  |
| Ye5AH124 | ---.....A.....-.....T.....A.....--.....           | 79 |
| Ye5AH125 | ---...T..A.A.....-.....T.....--.....              | 77 |
| Ye5AH126 | ---A.....-.....A.....-.....                       | 79 |
| Ye5AH128 | ---.....T.....-.....C.....T.....--.....           | 79 |
| Ye5AH131 | ---.....A.A.....-.....T.....A.....-A.....         | 79 |
| Ye5AH134 | ---...T..A.....-.....TG.....--.....               | 79 |
| Ye5AH137 | ---.....A.....A.....-.....                        | 79 |
| Ye5AH138 | ---.....A.....-.....T.....A.....--.....           | 79 |
| Ye5AH139 | ---.....A.....T-..A.....A..T.....--.....          | 79 |
| Ye5AH140 | ---.....T.....-.....T..C.....--.....              | 79 |

Ye5AH141 ---...A..A.....-.....G--..... 79  
 Ye5AH142 ---.....AC.....T.....C.....--..... 80  
 Ye5AH143 ---.....-.....T.....A.....C.....T..... 79  
 Ye5AH144 ---.....T.....A.....-A.A..... 79  
 Ye5AH145 ---.....T.....G.....--..... 79  
 Ye5AH146 ---.....A.....T.....-..... 79  
 Ye5AH147 -----...A..A.....-.....T.....A..T.....--..... 74  
 Ye5AH148 ---.....-.....A.....--..... 79  
 Ye5AH150 -----.....A.....--A..... 62  
 Ye5AH151 ---...T...T.....-.....A..A.....--..... 79  
 Ye5AH153 ---.....A.....T-.....G.....A.....T.....--..... 79  
 Ye5AH154 ---A.....A.....-.....T.....--..... 79  
 Ye5AH155 ---.....A.....-.....--.....A 79  
 Ye5AH156 ---.....T-A.....-.....G..... 76  
 Ye5AH157 ---.....A.....C.....-.....--..... 79  
 Ye5AH160 -----..... 6  
 Ye5AH161 ---...T...A.....-.....A.....T.....T.....--..... 79  
 Ye5AH162 ---.....C.....-.....A.....A.....A.....--..... 79  
 Ye5AH165 -----.....A.....--..... 51  
 Ye5AH166 ---.....-.....AAA.....--..... 79  
 Ye5AH167 ---.....-A.....-.....--..... 79  
 Ye5AH168 ---.....A.....C.....--.....T..... 79  
 Ye5AH169 ---...G...A.A.....-.....-.....T.....--..... 78  
 Ye5AH170 ---.....G.....T.....--T..... 79  
 Ye5AH172 ---.....AT.....A-.....A.....-..... 79  
 Ye5AH175 ---...T...T.....-.....T.....-.....--..... 79  
 Ye5AH176 ---...T...A.....-.....A..T...A..C.....--..... 79  
 Ye5AH177 ---...T...-.....-.....--..... 79  
 Ye5AH181 ---...T...T.....-.....A--.....A 79  
 Ye5AH190 ---...T...A.....T-.....C.....C..A.....--..... 79  
 Ye5AH191 ---...T...A-.....T.....-.....--..... 79

90 100 110 120 130 140 150 160 170  
 -----+-----+-----+-----+-----+-----+-----+  
 Ye5 AGACCATCCTGGCTAAC--ACGGTGAAACCCCGTCTCTACTAAAAATACAAAA-AA-----TTAGCCGGG 141  
 Ye5AH1 .....A.....A.....-.....-----..... 71  
 Ye5AH2 .....-----..... 141  
 Ye5AH4 .....G.....-.....-----..... 141  
 Ye5AH5 .....-----C...T..A.. 141  
 Ye5AH6 .....A.....-.....-----.....T... 141  
 Ye5AH8 .....-----AAAAAA-----..... 147  
 Ye5AH10 .....A.....-.....-----..... 141  
 Ye5AH12 .....A..A-.....-----..... 100  
 Ye5AH13 .....-----..... 141  
 Ye5AH14 .....A.....-.....-----..... 141  
 Ye5AH16 ...A.....TT.....-.....-----.....A..... 143  
 Ye5AH17 .....C...-.....T.....-.....-----.....TT... 138

Ye5AH18 .....-T-.....-.....-.....-.....A.. 141  
 Ye5AH20 .....-A.A.....-.....-.....-.....A.. 111  
 Ye5AH21 .....-A.....T.....A.....T.. 142  
 Ye5AH22 .....-T.....T.....T.....A..... 141  
 Ye5AH24 .....-T.....-.....-.....-.....-..... 136  
 Ye5AH27 .....-T.....T.....-.....-.....-.....A.. 141  
 Ye5AH29 .....-.....-.....A.T.CC.....AA..... 143  
 Ye5AH30 .....-A.....-.....-.....-.....-.....A.. 141  
 Ye5AH31 .....-.....T.....T.....A.....-..... 141  
 Ye5AH32 .....-A.....-.....-.....-.....-..... 141  
 Ye5AH34 .....-.....-.....-.....CA..... 141  
 Ye5AH35 .....G.....-.....-.....A..... 141  
 Ye5AH36 .....-.....-.....-.....-.....-.....-..... 0  
 Ye5AH37 .....-A.....C.....-.....-.....-..... 140  
 Ye5AH38 .....-A.....-.....-.....-.....-.....A.. 141  
 Ye5AH39 .....-A.....T.....-.....-.....-.....T.. 141  
 Ye5AH41 .....-.....-.....-.....-.....-.....A.. 141  
 Ye5AH43 .....T.G.....AG.....TA.....A.....TT..... 142  
 Ye5AH44 .....-A.....T.....-.....-.....-.....A.. 141  
 Ye5AH45 .....-.....T.....-.....AAAA..... 144  
 Ye5AH47 .....-.....-.....-.....-.....-.....-..... 0  
 Ye5AH48 .....-T.....T.....C.....-.....-.....-..... 141  
 Ye5AH50 .....-.....A.....-.....-.....-.....-..... 141  
 Ye5AH52 .....-.....-.....-.....-.....-.....-..... 0  
 Ye5AH53 .....-A.....-.....-.....A.....-.....-..... 141  
 Ye5AH54 .....G.....-A.....T.....-.....-.....-.....T.. 139  
 Ye5AH55 .....T.....-.....-.....A.....C.A.....-..... 120  
 Ye5AH56 .....-A.....-.....-.....-.....-.....-.....T.. 141  
 Ye5AH57 .....-.....-.....-.....-.....-.....-..... 0  
 Ye5AH60 .....-.....-.....-.....C.....-.....-.....C.G... 141  
 Ye5AH61 .....-.....-.....G.....-.....-.....-.....A.. 58  
 Ye5AH63 .....A.....-T.C.....G.....T.....-.....-..... 141  
 Ye5AH64 .....-.....-.....-.....-.....-.....-..... 141  
 Ye5AH66 .....T.....AA.....A.....-.....-.....A.. 141  
 Ye5AH68 .....-T.....-.....G.....-.....-.....-..... 141  
 Ye5AH69 .....-A.....-.....G.....-.....-.....-.....A.. 141  
 Ye5AH70 .....-.....C.....-.....-.....-.....-..... 132  
 Ye5AH71 .....C.....-C.....A.....-A.....-.....-..... 142  
 Ye5AH73 .....-A.....-.....-.....-.....-.....-..... 140  
 Ye5AH75 .....-.....T.....-.....A.....-.....-..... 142  
 Ye5AH76 .....C.A.....-.....-.....-.....C.....C.. 144  
 Ye5AH77 .....-A.....T.....-.....-.....-.....A.. 141  
 Ye5AH80 .....C.....G.....-A.....G.....-.....-.....A.. 141  
 Ye5AH85 .....-.....-.....-.....ATA.....-.....-..... 144  
 Ye5AH86 .....C.....AC.T.....TA.....A.....A..... 141  
 Ye5AH89 .....-A.....-.....-.....-.....-.....-..... 141  
 Ye5AH92 .....G.....-.....-.....-.....-.....-..... 141

|          |                                               |     |
|----------|-----------------------------------------------|-----|
| Ye5AH93  | .....--.....-..A-----.....                    | 142 |
| Ye5AH95  | .....--.A.....A-----.....                     | 141 |
| Ye5AH97  | .....A.C.....T.....-----.....                 | 141 |
| Ye5AH99  | -----.....T.....                              | 9   |
| Ye5AH100 | ..G.....--.A.....A.....A.....-----.....       | 132 |
| Ye5AH102 | .....--.....T.....-----.....A..               | 141 |
| Ye5AH103 | -----.....                                    | 0   |
| Ye5AH104 | .....--.A.....A.....-----.....T.....          | 140 |
| Ye5AH109 | .....--.A.....-----.....                      | 141 |
| Ye5AH110 | .....--.A.....T.....-----.....                | 141 |
| Ye5AH112 | .....--.....C.....G.....-----.....A..         | 141 |
| Ye5AH114 | .....--.....-----.....                        | 141 |
| Ye5AH115 | .....--.A.....-----.....                      | 141 |
| Ye5AH116 | ...T.....--.....C.....-----.....              | 141 |
| Ye5AH119 | .....--.....A.....-----.....                  | 141 |
| Ye5AH120 | .....G.....--.A.....T.....A.....-----.....T.. | 142 |
| Ye5AH122 | .....--.....-----.....                        | 141 |
| Ye5AH123 | -----.....                                    | 0   |
| Ye5AH124 | .....--.....T.....-----.....T..               | 141 |
| Ye5AH125 | .....--.....AAA-----.....                     | 142 |
| Ye5AH126 | .....G.....--.....-----.....A..               | 141 |
| Ye5AH128 | .....--.....G.....AAA-----.....               | 144 |
| Ye5AH131 | .....--.....A.....G.....-----.....            | 141 |
| Ye5AH134 | .....G.....--T.A.....G.....-----.....A..      | 141 |
| Ye5AH137 | .....--.A..T...A...A...A.....-----.....       | 140 |
| Ye5AH138 | .....--.A.....-----.....A..                   | 141 |
| Ye5AH139 | .....--.....-----.....T..                     | 141 |
| Ye5AH140 | .....--.A.....-----.....T..                   | 141 |
| Ye5AH141 | .....--.A.A.....A.....-----.....              | 141 |
| Ye5AH142 | .....G.....--.....G.....-----.....            | 142 |
| Ye5AH143 | .....G.....--.A.....G.A.....-----.....A..     | 141 |
| Ye5AH144 | .....--.....-----.....                        | 141 |
| Ye5AH145 | .....--.A.....-----.....                      | 141 |
| Ye5AH146 | .....--.A.....A.....C.....-----.....          | 141 |
| Ye5AH147 | .....--T.....-----.....                       | 136 |
| Ye5AH148 | .....--.A.....-----.....                      | 141 |
| Ye5AH150 | .....--.....G..T.A.....-----.....A..          | 124 |
| Ye5AH151 | .....--.A.....-----.....A..                   | 141 |
| Ye5AH153 | .....--.....C.....AA-----.....                | 143 |
| Ye5AH154 | .....G.....--.....T.....A.....-----.....C..   | 141 |
| Ye5AH155 | .A.....--.A.....-----.....A.....              | 141 |
| Ye5AH156 | .....--.A.....G-----.....                     | 138 |
| Ye5AH157 | ...G.....--.....C.....-----.....              | 141 |
| Ye5AH160 | .....--.....-----.....                        | 68  |
| Ye5AH161 | .....--T.....-----.....                       | 141 |
| Ye5AH162 | .....T.....--T.....T.....C.....-----.....     | 141 |
| Ye5AH165 | .....--T.....AAAAA.....A.....                 | 133 |



|          |                                       |     |
|----------|---------------------------------------|-----|
| Ye5AH44  | .....T.....A...A.....                 | 214 |
| Ye5AH45  | .....C.G...C.....A.....               | 217 |
| Ye5AH47  | -----C-----                           | 22  |
| Ye5AH48  | T.....T.....T.....A.....              | 214 |
| Ye5AH50  | ..T.....T...C.....                    | 213 |
| Ye5AH52  | -----                                 | 17  |
| Ye5AH53  | .....A..A...-.....T.....A.....        | 214 |
| Ye5AH54  | .....A.....-AG.....CT.....            | 212 |
| Ye5AH55  | .....-.....-.....C.....               | 193 |
| Ye5AH56  | .....T...A.....-.....A.....           | 214 |
| Ye5AH57  | -----.....C.....A.....                | 64  |
| Ye5AH60  | T.....-.....C.....A.....A.....        | 214 |
| Ye5AH61  | .....T.T.....-.....G.....G.....       | 131 |
| Ye5AH63  | .....T.....T.....-.....A.....         | 214 |
| Ye5AH64  | .....AA.....-.....T.....A.....-C..... | 215 |
| Ye5AH66  | T.....-.....T.T.....-.....A.....      | 214 |
| Ye5AH68  | ...TGGG...T.....-.....A.....          | 218 |
| Ye5AH69  | .C.....-.....A.....-.....A.....       | 214 |
| Ye5AH70  | .....A.....A...-.....T.....A.....     | 205 |
| Ye5AH71  | ..T.....-.....-.....                  | 215 |
| Ye5AH73  | .....A.....-.....-.....               | 213 |
| Ye5AH75  | ..C.....-.....-.....T.....            | 215 |
| Ye5AH76  | ..T.....T...T.....-.....-.....        | 217 |
| Ye5AH77  | T..A-----A...A.....-.....G.....-..... | 214 |
| Ye5AH80  | ..A-----A...T.....-.....C.....-.....  | 214 |
| Ye5AH85  | .....A.....-.....-.....               | 217 |
| Ye5AH86  | .....A..A...-A.....-.....-.....       | 214 |
| Ye5AH89  | ..T.....A.....-.....-.....-.....      | 214 |
| Ye5AH92  | .....C.....-.....-.....-.....         | 213 |
| Ye5AH93  | G.....-.....-.....A.....-.....        | 215 |
| Ye5AH95  | .....T.T.....-.....-.....-.....       | 214 |
| Ye5AH97  | .....-.....-.....-.....-.....         | 214 |
| Ye5AH99  | .....T.....-.....AT.....-.....A.....  | 82  |
| Ye5AH100 | .....-.....-.....T.....-.....         | 205 |
| Ye5AH102 | .....G.....-.....T.....-.....A.....   | 214 |
| Ye5AH103 | -----T.C-----                         | 37  |
| Ye5AH104 | .AT.....-.....-.....-.....A.....      | 213 |
| Ye5AH109 | .....A.....-.....-.....-.....         | 214 |
| Ye5AH110 | .....A.....-.....-.....-.....         | 214 |
| Ye5AH112 | .....T.....-.....-.....-.....         | 214 |
| Ye5AH114 | .....C.....-.....CA.....-.....        | 214 |
| Ye5AH115 | .....A.....A...-.....-.....-.....     | 214 |
| Ye5AH116 | ..T.....-.....-.....-.....-.....      | 214 |
| Ye5AH119 | .....A...-.....-.....AAA.....-.....   | 214 |
| Ye5AH120 | .....A.....-.....C.....-.....-.....   | 215 |
| Ye5AH122 | T.....A.....-.....-.....-.....        | 214 |
| Ye5AH123 | -----.....-.....-.....A.....          | 56  |

|          |                              |     |
|----------|------------------------------|-----|
| Ye5AH124 | .....A.....C.....            | 214 |
| Ye5AH125 | .....A..A.....AAA.....       | 215 |
| Ye5AH126 | TA.....T.....                | 214 |
| Ye5AH128 | .....G.T.....                | 217 |
| Ye5AH131 | .....G.....                  | 214 |
| Ye5AH134 | ..A.....T.....               | 214 |
| Ye5AH137 | .....T.....C.....            | 213 |
| Ye5AH138 | .....T.....A.....            | 214 |
| Ye5AH139 | ..T.....C.....G.....         | 214 |
| Ye5AH140 | .....T.....A.....            | 214 |
| Ye5AH141 | .....A.....A..A.T.....A..... | 214 |
| Ye5AH142 | .A.....G..T.....             | 215 |
| Ye5AH143 | .A.....C.....                | 214 |
| Ye5AH144 | .....T.....G.....            | 214 |
| Ye5AH145 | .....T.....A.....C.....      | 214 |
| Ye5AH146 | ..C.....T..A..A.....         | 214 |
| Ye5AH147 | .....A.....                  | 209 |
| Ye5AH148 | .T.....T..A.....             | 214 |
| Ye5AH150 | .AT.....T.....TA.....A.....  | 199 |
| Ye5AH151 | T.....T.....G.....A.....     | 214 |
| Ye5AH153 | ..A.....T.....G..AG.....     | 216 |
| Ye5AH154 | .....A.....T.....            | 214 |
| Ye5AH155 | .....                        | 214 |
| Ye5AH156 | .....G.....T.....            | 211 |
| Ye5AH157 | .....AT.....                 | 214 |
| Ye5AH160 | .....A.....AAA.....          | 141 |
| Ye5AH161 | .....T.....T.....G.....      | 214 |
| Ye5AH162 | .....A.....                  | 214 |
| Ye5AH165 | .....T.....GT.....T.....     | 207 |
| Ye5AH166 | A.T.....CTA.....T.....       | 208 |
| Ye5AH167 | .....CTA.....                | 214 |
| Ye5AH168 | .A.....A.....T..A.....       | 213 |
| Ye5AH169 | ..T.....                     | 214 |
| Ye5AH170 | .....A.....C.....            | 214 |
| Ye5AH172 | .A.....A.....G.....G.....    | 214 |
| Ye5AH175 | T.....CTA.....               | 217 |
| Ye5AH176 | .....A..A.....AAA.....       | 214 |
| Ye5AH177 | .....A.....AAA.....A.....    | 214 |
| Ye5AH181 | .....A.....G.....            | 214 |
| Ye5AH190 | ..T.....A.....A.....         | 214 |
| Ye5AH191 | .....A.....C.....G.....      | 216 |

260 270 280 290 300 310 320 330 340

|        |                                                                                   |     |
|--------|-----------------------------------------------------------------------------------|-----|
| Ye5    | GGAGCCTGCAGTG-----AGCCGAGATCGCG-CCACTGCACTC-----CAGCCTGGGCGACAG--CGAGACTCC-GTCTCA | 281 |
| Ye5AH1 | .....AG.....A                                                                     | 214 |
| Ye5AH2 | .....A.....A                                                                      | 282 |



|         |                                            |     |
|---------|--------------------------------------------|-----|
| Ye5AH4  | .....A.-.....T.....A.--.....-A....A        | 282 |
| Ye5AH5  | .....A.A...A-.....A.....T-.....A           | 282 |
| Ye5AH6  | .....C...A.-T.....T.AG.A...A-.....A        | 284 |
| Ye5AH8  | .....-.....-.....-A....A                   | 288 |
| Ye5AH10 | .....C.....T.....-.....A                   | 282 |
| Ye5AH12 | .....T.....-.....A                         | 241 |
| Ye5AH13 | .....-.....A.A.....-.....A                 | 282 |
| Ye5AH14 | .....T.....A.T.--.....-A....A              | 281 |
| Ye5AH16 | .....A...C-.....-.....A                    | 284 |
| Ye5AH17 | .....G.....A.G.--.....A                    | 279 |
| Ye5AH18 | .....A-.....A.....-.....A                  | 282 |
| Ye5AH20 | .....-.....A...AG.....-.....A              | 254 |
| Ye5AH21 | .....-.....-.....-.....A                   | 283 |
| Ye5AH22 | .....-.....-.....-A....A                   | 282 |
| Ye5AH24 | .....-.....-.....G-.....A                  | 277 |
| Ye5AH27 | .....AT.....T.....T.--.....T-...A.A        | 282 |
| Ye5AH29 | .....T.-.....A.....-.....A                 | 284 |
| Ye5AH30 | .....T.T.-.....G-----A.A...--C.....A       | 282 |
| Ye5AH31 | .....-.....-.....-.....A                   | 282 |
| Ye5AH32 | .....A-.....T.....-.....G-.....G           | 282 |
| Ye5AH34 | .....G.....-.....-.....C.....-.....A       | 282 |
| Ye5AH35 | .....-.....-.....-.....G.....-.....A       | 282 |
| Ye5AH36 | .....G.A.G.-.....C.....-.....A             | 84  |
| Ye5AH37 | .....T.....-.....-G.....-.....A            | 281 |
| Ye5AH38 | .....A...A-.....G.A.T...AG.A...T-.....A    | 284 |
| Ye5AH39 | .....-.....T.....-A.C...A.T-CC...T         | 281 |
| Ye5AH41 | .....T.A-.....T.T.AG.A...T.A-.....A        | 284 |
| Ye5AH43 | .....-.....A.....-GA.....-.....A           | 232 |
| Ye5AH44 | .....-.....-T.....--...C.A                 | 280 |
| Ye5AH45 | .....-.....A...T...-T.....-.....A          | 285 |
| Ye5AH47 | .....-.....A.....-.....A                   | 90  |
| Ye5AH48 | .....A.....T.....-.....-A....A             | 282 |
| Ye5AH50 | .....-.....T.....-.....TC.-T...A           | 281 |
| Ye5AH52 | .....T.....-.....A.....-T.....-.....A      | 85  |
| Ye5AH53 | .....T.T.-T.....-.....-A...A               | 282 |
| Ye5AH54 | AGCCTG...A.....-.....AG.....-.....A        | 288 |
| Ye5AH55 | .....T...T.-.....-.....-A.T...A            | 261 |
| Ye5AH56 | .....C.-.....G.....-C.....A                | 282 |
| Ye5AH57 | .....C-----G.....AG.....T-...A.A           | 134 |
| Ye5AH60 | .....A.....T.....A...-G.....-.....A        | 282 |
| Ye5AH61 | .....G.....GA-----T.A.AG.....-...A.A       | 201 |
| Ye5AH63 | .....A.-.....A.....-.....A                 | 282 |
| Ye5AH64 | .....-.....C.....-.....A.....-.....A       | 282 |
| Ye5AH66 | A-----G.-.....T.....-.....-A....A          | 282 |
| Ye5AH68 | .....A...A-.....-.....-T.....-.....A       | 286 |
| Ye5AH69 | .....T.-.....T.....-.....-.....A           | 282 |
| Ye5AH70 | .....T.T.-.....TGCACTC.....-A.....T-.....A | 280 |

|          |                                   |     |
|----------|-----------------------------------|-----|
| Ye5AH71  | .....T.....                       | 283 |
| Ye5AH73  | .....A.....G.....                 | 281 |
| Ye5AH75  | .....C.....T.....T.....AC.....    | 283 |
| Ye5AH76  | .....AGG.....A.....               | 287 |
| Ye5AH77  | .....A.C.....A.....A.....AC.....  | 282 |
| Ye5AH80  | .....A.....A.....A.....           | 282 |
| Ye5AH85  | .....A.....                       | 285 |
| Ye5AH86  | .....T.....T.....AC.....A.....    | 282 |
| Ye5AH89  | .....A.....C.....A-G.....         | 281 |
| Ye5AH92  | .....C.....A.....G.....           | 281 |
| Ye5AH93  | .....A.....                       | 282 |
| Ye5AH95  | .....T.....A.....                 | 282 |
| Ye5AH97  | .....T.....AG.....A.....          | 284 |
| Ye5AH99  | .....A.....T.....T.....GT-C..AA.A | 150 |
| Ye5AH100 | .....A.....AG.....A.....          | 273 |
| Ye5AH102 | .....T.....C.....                 | 282 |
| Ye5AH103 | .....C.....CT.....A.....          | 105 |
| Ye5AH104 | .....T.....T.G.....               | 281 |
| Ye5AH109 | .....AG.....                      | 284 |
| Ye5AH110 | .....A.....T.....G.....           | 282 |
| Ye5AH112 | .....T.....A.....                 | 282 |
| Ye5AH114 | .....A.A.....                     | 282 |
| Ye5AH115 | .....G.....                       | 282 |
| Ye5AH116 | .....G.T.....G.....A.....A.....   | 282 |
| Ye5AH119 | .....C.....A.....                 | 282 |
| Ye5AH120 | .....A.....A.....                 | 283 |
| Ye5AH122 | .....A.....                       | 282 |
| Ye5AH123 | .....T.....AG.....                | 126 |
| Ye5AH124 | .....A.....A.....A.....A.....     | 282 |
| Ye5AH125 | .....GA.....                      | 283 |
| Ye5AH126 | .....A.....C.....                 | 282 |
| Ye5AH128 | .....T.A.AG.A.....                | 287 |
| Ye5AH131 | .....T.A.AG.....CA                | 284 |
| Ye5AH134 | .....A.....T.....A.....T.....     | 282 |
| Ye5AH137 | .....A.C.....G.G.....A.....       | 282 |
| Ye5AH138 | .....T.....T.....                 | 282 |
| Ye5AH139 | .....A.....T.A.AG.A.....          | 284 |
| Ye5AH140 | .....A.....                       | 282 |
| Ye5AH141 | .....G.....                       | 282 |
| Ye5AH142 | .....T.A.....C.....AG.....        | 285 |
| Ye5AH143 | .....T.....                       | 281 |
| Ye5AH144 | .....A.....A.....                 | 282 |
| Ye5AH145 | .....A.....T.....T                | 282 |
| Ye5AH146 | .....T.....A.....TT.....          | 283 |
| Ye5AH147 | .....A.....                       | 277 |
| Ye5AH148 | .....AC.....C.....T.....G.T.....  | 282 |
| Ye5AH150 | .....T.....T.T.AG.....G.....      | 269 |

|          |                                                                   |     |
|----------|-------------------------------------------------------------------|-----|
| Ye5AH151 | .....------.....-.....-.....-.....T.....AG...G...-.....A          | 284 |
| Ye5AH153 | .....------.....G...-.....-.....-.....A...--.....T-.....A         | 284 |
| Ye5AH154 | .....------.....T-.....-.....-.....-.....G...-A...A               | 282 |
| Ye5AH155 | .....------.....-T.....-.....-.....T.....-.....C...-A...T.A       | 282 |
| Ye5AH156 | .....------.....G...-.....-.....-.....-.....-.....-.....A         | 279 |
| Ye5AH157 | .....------.....T...C.....-.....-.....G...--.....-.....A          | 282 |
| Ye5AH160 | .....------.....-.....-.....-.....A.....-.....-.....-.....A       | 209 |
| Ye5AH161 | .....------.....A.....-.....-.....-.....T...A...AG.....-T...A     | 284 |
| Ye5AH162 | .....------.....G...-.....G-----.....T...A...AG.....T-.....A      | 284 |
| Ye5AH165 | .....------.....-.....-.....-.....T...T...A...AG.A.....T-.....CA  | 277 |
| Ye5AH166 | .....------.....-.....-.....-.....A.....-.....-.....-.....A       | 276 |
| Ye5AH167 | .....------.....-.....-.....-.....T.....-.....AG.....-A...A       | 284 |
| Ye5AH168 | .....------.....T...-.....-.....-.....-.....-.....C...-.....A     | 281 |
| Ye5AH169 | .....------.....A.....A-.....-.....T.....T.....-.....AT...-.....A | 282 |
| Ye5AH170 | .....------.....-.....-.....-.....T.....-.....-G.....-.....A      | 282 |
| Ye5AH172 | .....------.....T.....-.....-.....-.....A--G.....-.....A          | 281 |
| Ye5AH175 | .....------.....-.....A...G-----.....A.....-.....-.....A          | 285 |
| Ye5AH176 | .....------.....-.....-.....-.....A.....-.....-.....-.....A       | 282 |
| Ye5AH177 | .....------.....-.....-.....-.....A.....-.....G.....-.....A       | 282 |
| Ye5AH181 | .....------.....T...A.....-.....-.....T.....-.....-.....A         | 282 |
| Ye5AH190 | .....------.....-.....T.....-.....-.....A.....-.....-.....A       | 282 |
| Ye5AH191 | .....------.....A.....-.....T.....-.....A.....-.....-.....A       | 284 |
